# Supplementary material
Source: Royal Society of Chemistry journal article supplement (https://www.rsc.org/suppdata/dt/1999/223/806174b.doc)
Supplement: Supplementary file 1 [file 806174b.doc]

Supplementary magnetic data for **1**, [(Ni2(L1)(N3)(H2O)](CF3SO3)3.4H2O:

| T/K | exp/10-6cm3 mol-1 | calc/10-6cm3 mol-1 | exp/BM | calc/BM |
| --- | --- | --- | --- | --- |
| 290.2 | 2090.8 | 2375.1 | 2.203 | 2.348 |
| 290.0 | 2208.4 | 2377.5 | 2.263 | 2.348 |
| 288.1 | 2427.8 | 2394.1 | 2.365 | 2.349 |
| 288.1 | 2336.3 | 2393.1 | 2.320 | 2.348 |
| 285.9 | 2332.0 | 2413.6 | 2.309 | 2.349 |
| 285.1 | 2425.8 | 2420.2 | 2.352 | 2.349 |
| 280.2 | 2383.4 | 2465.8 | 2.311 | 2.351 |
| 275.1 | 2768.7 | 2514.5 | 2.468 | 2.352 |
| 269.7 | 2530.1 | 2568.3 | 2.336 | 2.354 |
| 265.0 | 2522.1 | 2616.6 | 2.312 | 2.355 |
| 259.9 | 2688.5 | 2671.5 | 2.364 | 2.357 |
| 255.0 | 2829.6 | 2727.1 | 2.402 | 2.358 |
| 250.1 | 2642.1 | 2783.4 | 2.299 | 2.360 |
| 245.0 | 2854.2 | 2845.6 | 2.365 | 2.361 |
| 239.6 | 2767.5 | 2914.5 | 2.303 | 2.363 |
| 234.8 | 3026.3 | 2978.7 | 2.384 | 2.365 |
| 229.9 | 3045.1 | 3047.9 | 2.366 | 2.367 |
| 224.8 | 2930.1 | 3122.5 | 2.295 | 2.369 |
| 219.7 | 3246.2 | 3201.0 | 2.388 | 2.371 |
| 214.8 | 3318.9 | 3278.5 | 2.388 | 2.373 |
| 209.6 | 3362.3 | 3367.5 | 2.374 | 2.376 |
| 204.9 | 3552.8 | 3450.8 | 2.413 | 2.378 |
| 199.5 | 3627.8 | 3552.4 | 2.406 | 2.381 |
| 194.9 | 3717.7 | 3644.9 | 2.407 | 2.383 |
| 189.5 | 3849.1 | 3758.2 | 2.415 | 2.386 |
| 184.8 | 3995.5 | 3862.1 | 2.430 | 2.389 |
| 179.5 | 4125.9 | 3985.8 | 2.434 | 2.392 |
| 174.7 | 4180.5 | 4106.2 | 2.417 | 2.395 |
| 169.6 | 4395.7 | 4242.1 | 2.442 | 2.399 |
| 164.7 | 4395.6 | 4383.0 | 2.406 | 2.403 |
| 160.0 | 4542.7 | 4524.3 | 2.411 | 2.406 |
| 154.9 | 4716.0 | 4689.7 | 2.417 | 2.410 |
| 149.8 | 5047.5 | 4867.1 | 2.459 | 2.415 |
| 145.2 | 5343.5 | 5038.4 | 2.491 | 2.419 |
| 139.7 | 5352.5 | 5262.2 | 2.445 | 2.424 |
| 134.9 | 5636.2 | 5469.4 | 2.466 | 2.429 |
| 130.0 | 5560.8 | 5704.1 | 2.404 | 2.435 |
| 126.1 | 6025.5 | 5900.9 | 2.465 | 2.439 |
| 119.9 | 6487.1 | 6246.4 | 2.494 | 2.447 |
| 115.4 | 6894.8 | 6519.9 | 2.523 | 2.453 |
| 109.7 | 7062.6 | 6910.7 | 2.489 | 2.462 |
| 104.9 | 7209.5 | 7273.9 | 2.459 | 2.470 |
| 100.0 | 7586.8 | 7683.3 | 2.463 | 2.479 |
| 95.2 | 8015.6 | 8132.2 | 2.470 | 2.488 |
| 89.7 | 8656.5 | 8708.7 | 2.492 | 2.500 |
| 85.3 | 8977.3 | 9239.5 | 2.474 | 2.510 |
| 79.9 | 9590.3 | 9962.1 | 2.476 | 2.524 |
| 75.2 | 10460.1 | 10703.8 | 2.508 | 2.537 |
| 69.9 | 11321.1 | 11675.0 | 2.515 | 2.554 |
| 65.3 | 12600.1 | 12640.3 | 2.566 | 2.570 |
| 55.3 | 15704.9 | 15441.5 | 2.635 | 2.613 |
| 45.4 | 19607.1 | 19609.6 | 2.667 | 2.667 |
| 33.3 | 28699.9 | 28539.1 | 2.763 | 2.755 |
| 28.4 | 34493.5 | 34391.9 | 2.801 | 2.797 |
| 23.5 | 43254.7 | 42948.9 | 2.850 | 2.840 |
| 18.5 | 54809.5 | 55678.3 | 2.850 | 2.873 |
| 13.4 | 71852.3 | 76334.7 | 2.777 | 2.862 |
| 10.6 | 97210.6 | 93104.2 | 2.868 | 2.807 |
| 8.6 | 110786.1 | 107965.3 | 2.762 | 2.727 |
| 8.4 | 103162.3 | 109825.6 | 2.631 | 2.715 |
| 6.5 | 129539.3 | 127863.2 | 2.593 | 2.576 |
| 6.4 | 125060.3 | 128600.9 | 2.534 | 2.570 |
| 4.9 | 147283.7 | 146032.0 | 2.400 | 2.390 |
| 4.9 | 152483.8 | 146032.0 | 2.442 | 2.390 |

Supplementary magnetic data for **2**, [Ni2(L1)(N3)](ClO4)3MeCN.2H2O:

| T/K | exp/  10-6cm3 mol-1 | calc/  10-6cm3 mol-1 | exp/BM | calc/BM |
| --- | --- | --- | --- | --- |
| 291.3 | 2330.5 | 2247.7 | 2.330 | 2.288 |
| 289.1 | 2226.9 | 2265.3 | 2.269 | 2.289 |
| 287.2 | 2295.3 | 2280.8 | 2.296 | 2.289 |
| 281.1 | 2314.8 | 2332.4 | 2.281 | 2.290 |
| 270.8 | 2385.3 | 2423.8 | 2.273 | 2.291 |
| 260.7 | 2512.5 | 2521.2 | 2.289 | 2.293 |
| 250.7 | 2577.1 | 2626.7 | 2.273 | 2.295 |
| 240.5 | 2738.9 | 2743.1 | 2.295 | 2.297 |
| 230.5 | 2937.1 | 2866.5 | 2.327 | 2.299 |
| 220.3 | 2911.8 | 3005.6 | 2.265 | 2.301 |
| 210.4 | 3171.6 | 3154.2 | 2.310 | 2.304 |
| 200.3 | 3311.1 | 3320.9 | 2.303 | 2.306 |
| 190.2 | 3501.7 | 3506.1 | 2.308 | 2.309 |
| 180.1 | 3758.8 | 3713.1 | 2.327 | 2.313 |
| 170.1 | 3957.4 | 3945.6 | 2.320 | 2.317 |
| 160.1 | 4253.7 | 4205.2 | 2.334 | 2.321 |
| 150.1 | 4633.3 | 4505.9 | 2.358 | 2.325 |
| 139.9 | 4860.5 | 4855.1 | 2.332 | 2.331 |
| 129.8 | 5269.4 | 5259.4 | 2.339 | 2.337 |
| 119.8 | 5758.1 | 5732.4 | 2.349 | 2.344 |
| 109.9 | 6294.4 | 6293.4 | 2.352 | 2.352 |
| 99.8 | 6918.4 | 6985.9 | 2.350 | 2.361 |
| 89.8 | 7787.2 | 7839.3 | 2.365 | 2.373 |
| 79.7 | 8890.7 | 8935.1 | 2.381 | 2.387 |
| 69.6 | 10237.4 | 10378.1 | 2.388 | 2.404 |
| 59.6 | 12185.0 | 12339.9 | 2.411 | 2.426 |
| 49.6 | 15107.3 | 15178.8 | 2.449 | 2.455 |
| 39.6 | 19714.6 | 19598.7 | 2.500 | 2.493 |
| 34.5 | 23141.9 | 22934.7 | 2.528 | 2.517 |
| 29.6 | 27699.8 | 27361.4 | 2.559 | 2.543 |
| 24.6 | 34043.5 | 33627.8 | 2.588 | 2.572 |
| 19.6 | 43213.5 | 43173.6 | 2.600 | 2.599 |
| 14.5 | 57099.1 | 58383.0 | 2.575 | 2.604 |
| 9.5 | 84559.1 | 83374.4 | 2.532 | 2.514 |
| 7.4 | 93524.2 | 96884.1 | 2.359 | 2.401 |
| 5.4 | 111260.4 | 110915.2 | 2.190 | 2.187 |
| 4.4 | 117888.0 | 116177.2 | 2.046 | 2.031 |

Supplementary magnetic data for **3**, [Co2(L1)(N3)](ClO4)3.H2O:

| T/K | exp/BM | calc/BM | exp/  10-6cm3 mol-1 | calc/  10-6cm3 mol-1 |
| --- | --- | --- | --- | --- |
| 290.7 | 4.148 | 4.176 | 7400.0 | 7500.0 |
| 288.5 | 4.142 | 4.171 | 7435.0 | 7540.0 |
| 286.6 | 4.136 | 4.174 | 7465.0 | 7600.0 |
| 280.5 | 4.136 | 4.167 | 7625.0 | 7740.0 |
| 270.5 | 4.121 | 4.166 | 7850.0 | 8020.0 |
| 260.5 | 4.130 | 4.163 | 8190.0 | 8320.0 |
| 250.5 | 4.146 | 4.156 | 8580.0 | 8620.0 |
| 240.3 | 4.108 | 4.150 | 8780.0 | 8960.0 |
| 230.4 | 4.096 | 4.144 | 9105.0 | 9320.0 |
| 220.4 | 4.116 | 4.140 | 9610.0 | 9720.0 |
| 210.4 | 4.103 | 4.134 | 10005.0 | 10160.0 |
| 200.1 | 4.092 | 4.127 | 10460.0 | 10640.0 |
| 190.2 | 4.105 | 4.120 | 11075.0 | 11160.0 |
| 180.1 | 4.098 | 4.116 | 11655.0 | 11760.0 |
| 170.2 | 4.092 | 4.108 | 12300.0 | 12400.0 |
| 160.1 | 4.074 | 4.099 | 12960.0 | 13120.0 |
| 150.1 | 4.051 | 4.087 | 13675.0 | 13920.0 |
| 140.1 | 4.062 | 4.077 | 14730.0 | 14840.0 |
| 129.9 | 4.039 | 4.067 | 15700.0 | 15920.0 |
| 120.1 | 4.029 | 4.053 | 16900.0 | 17100.0 |
| 110.0 | 4.013 | 4.037 | 18305.0 | 18520.0 |
| 100.0 | 3.994 | 4.019 | 19955.0 | 20200.0 |
| 90.2 | 3.975 | 3.996 | 21915.0 | 22140.0 |
| 79.9 | 3.949 | 3.968 | 24415.0 | 24640.0 |
| 69.8 | 3.912 | 3.931 | 27420.0 | 27680.0 |
| 59.8 | 3.873 | 3.884 | 31375.0 | 31540.0 |
| 49.8 | 3.812 | 3.818 | 36500.1 | 36600.1 |
| 39.8 | 3.732 | 3.718 | 43760.1 | 43440.1 |
| 34.7 | 3.662 | 3.646 | 48355.0 | 47920.0 |
| 29.7 | 3.570 | 3.553 | 53650.0 | 53120.0 |
| 24.7 | 3.438 | 3.423 | 59750.2 | 59219.9 |
| 19.7 | 3.239 | 3.233 | 66549.8 | 66299.8 |
| 14.7 | 2.933 | 2.938 | 73300.2 | 73579.9 |
| 9.6 | 2.460 | 2.463 | 78550.2 | 78740.0 |
| 7.6 | 2.190 | 2.194 | 79149.9 | 79440.0 |
| 5.5 | 1.861 | 1.862 | 79199.8 | 79220.2 |
| 4.7 | 1.715 | 1.713 | 78949.7 | 78760.2 |

Supplementary magnetic data for **4**, [Mn2(L2)(N3)](CF3SO3)3:

| T/K | exp/  10-6cm3 mol-1 | calc/  10-6cm3 mol-1 | exp/BM | calc/BM |
| --- | --- | --- | --- | --- |
| 296.3 | 11994.0 | 11929.1 | 5.331 | 5.317 |
| 286.8 | 12338.0 | 12242.0 | 5.320 | 5.299 |
| 277.1 | 12709.0 | 12578.1 | 5.307 | 5.280 |
| 267.3 | 13080.0 | 12935.9 | 5.288 | 5.259 |
| 257.4 | 13446.0 | 13317.3 | 5.261 | 5.236 |
| 247.6 | 13859.0 | 13716.2 | 5.239 | 5.212 |
| 237.8 | 14279.0 | 14137.8 | 5.211 | 5.185 |
| 228.0 | 14734.0 | 14583.9 | 5.183 | 5.157 |
| 218.2 | 15197.0 | 15056.4 | 5.150 | 5.126 |
| 208.5 | 15672.0 | 15551.8 | 5.112 | 5.092 |
| 198.7 | 16214.0 | 16082.5 | 5.076 | 5.055 |
| 188.9 | 16753.0 | 16645.4 | 5.031 | 5.015 |
| 179.2 | 17345.0 | 17236.3 | 4.986 | 4.970 |
| 169.5 | 17955.0 | 17862.5 | 4.934 | 4.921 |
| 159.8 | 18618.0 | 18525.6 | 4.878 | 4.866 |
| 150.0 | 19289.0 | 19233.7 | 4.810 | 4.803 |
| 140.3 | 20014.0 | 19972.5 | 4.739 | 4.734 |
| 130.6 | 20770.0 | 20747.2 | 4.658 | 4.655 |
| 121.0 | 21553.0 | 21545.4 | 4.567 | 4.566 |
| 111.2 | 22368.0 | 22384.7 | 4.460 | 4.462 |
| 101.5 | 23203.0 | 23226.7 | 4.340 | 4.342 |
| 100.7 | 23219.0 | 23296.0 | 4.324 | 4.331 |
| 95.9 | 23634.0 | 23710.1 | 4.258 | 4.264 |
| 91.1 | 24023.0 | 24117.9 | 4.184 | 4.192 |
| 86.2 | 24383.0 | 24523.3 | 4.100 | 4.112 |
| 81.4 | 24717.0 | 24904.7 | 4.011 | 4.027 |
| 76.6 | 25046.0 | 25264.6 | 3.917 | 3.934 |
| 71.8 | 25337.0 | 25596.3 | 3.814 | 3.834 |
| 67.1 | 25581.0 | 25886.7 | 3.705 | 3.727 |
| 62.4 | 25811.0 | 26135.6 | 3.589 | 3.612 |
| 57.5 | 25973.0 | 26343.0 | 3.456 | 3.481 |
| 52.7 | 26142.0 | 26487.4 | 3.319 | 3.341 |
| 47.8 | 26268.0 | 26568.7 | 3.169 | 3.187 |
| 42.7 | 26522.0 | 26578.3 | 3.010 | 3.013 |
| 37.5 | 26547.0 | 26507.3 | 2.822 | 2.820 |
| 33.7 | 26324.0 | 26402.6 | 2.664 | 2.668 |
| 31.5 | 26264.0 | 26320.2 | 2.572 | 2.575 |
| 28.5 | 26170.0 | 26178.9 | 2.442 | 2.443 |
| 24.9 | 25917.0 | 25955.0 | 2.272 | 2.273 |
| 23.2 | 25806.0 | 25822.2 | 2.188 | 2.189 |
| 19.5 | 25542.0 | 25445.0 | 1.996 | 1.992 |
| 17.1 | 25277.0 | 25103.0 | 1.859 | 1.853 |
| 15.5 | 25064.0 | 24808.0 | 1.763 | 1.754 |
| 14.8 | 24910.0 | 24655.7 | 1.717 | 1.708 |
| 12.3 | 24330.0 | 23938.7 | 1.547 | 1.535 |
| 10.7 | 23722.0 | 23251.0 | 1.425 | 1.411 |
| 8.8 | 22423.0 | 21978.3 | 1.256 | 1.244 |
| 7.1 | 20528.0 | 20048.4 | 1.080 | 1.067 |
| 5.6 | 17449.0 | 17403.9 | 0.884 | 0.883 |
| 4.2 | 13817.0 | 14702.9 | 0.681 | 0.703 |

Supplementary X-ray powder diffraction data of **5**, [Cu2(L1)(N3)](ClO4)3:

| 2  | % |
| --- | --- |
| 10.612 | 34.88 |
| 11.092 | 55.38 |
| 13.094 | 40.74 |
| 16.846 | 100.00 |
| 18.334 | 82.53 |
| 19.474 | 56.51 |
| 21.208 | 53.68 |
| 22.298 | 45.51 |
| 32.048 | 26.65 |

Supplementary X-ray powder diffraction data of **6**, [Fe2(L1)(N3)](ClO4)3.2H2O:

| 2  | % |
| --- | --- |
| 10.780 | 67.57 |
| 11.136 | 81.13 |
| 13.052 | 69.48 |
| 16.760 | 100.00 |
| 18.283 | 99.12 |
| 19.407 | 83.56 |
| 21.131 | 78.09 |
| 22.414 | 65.40 |
| 31.850 | 36.39 |
